# Supplementary material
Source: PubMed Central journal article supplement (PMC3831974)
Supplement: 1314863110_pnas.201314863SI.pdf [file 1314863110_pnas.201314863SI.pdf]

# Supporting Information

Wang et al. 10.1073/pnas.1314863110

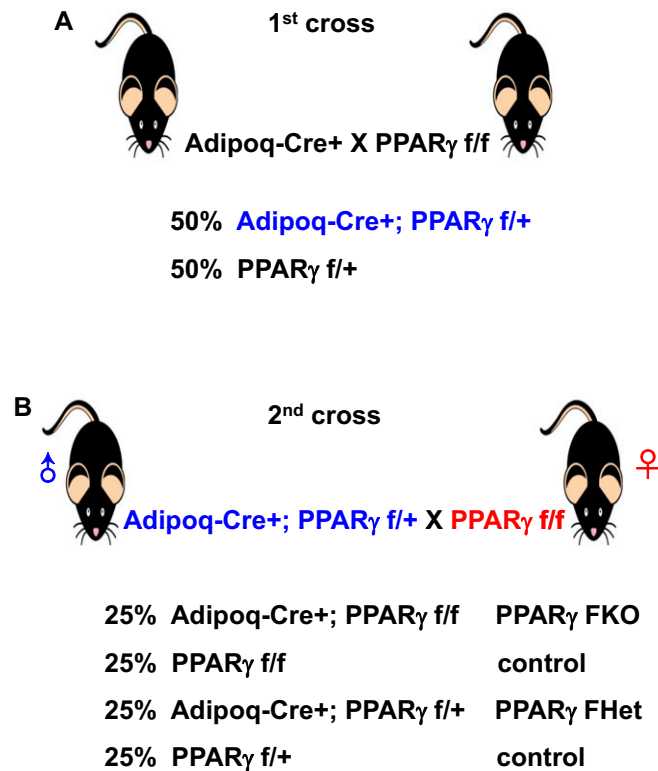

**Fig. S1.** Schematic of breeding strategy used to generate peroxisome proliferator-activated receptor gamma (PPAR $\gamma$ ) fat-specific knockout (FKO) mice. (A) The first cross is between Adipoq-Cre+ mice and PPAR $\gamma$  floxed (PPAR $\gamma$  f/f) mice. The progeny include 50% Adipoq-Cre+; PPAR $\gamma$  f/+ mice. (B) The second cross is between male Adipoq-Cre+; PPAR $\gamma$  f/+ mice generated by the first breeding and female PPAR $\gamma$  f/f mice. Out of their progeny, 25% are PPAR $\gamma$  FKO (Adipoq-Cre+; PPAR $\gamma$  f/f), 25% are PPAR $\gamma$  FHet (Adipoq-Cre+; PPAR $\gamma$  f/+), and the rest of them are control (PPAR $\gamma$  f/f or PPAR $\gamma$  f/+) mice.



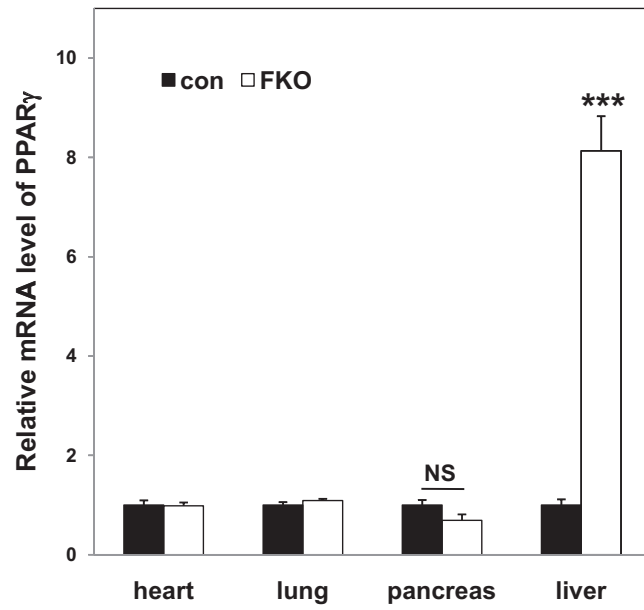

**Fig. S3.** PPAR $\gamma$  expression in heart, lung, pancreas, and liver of 3-mo-old male control and PPAR $\gamma$  FKO mice. Values are mean  $\pm$  SEM ( $n = 5$ ). NS, not significant; \*\*\* $p < 0.001$  vs. controls.

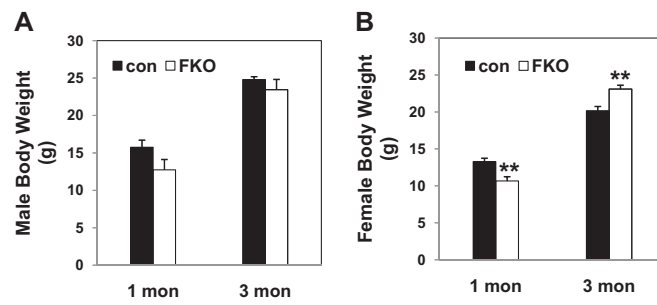

**Fig. S4.** Body weight of male (A) or female (B) control and PPAR $\gamma$  FKO mice at age 1 or 3 mo. Values are mean  $\pm$  SEM ( $n = 4-8$ ). \*\* $P < 0.01$  vs. controls.

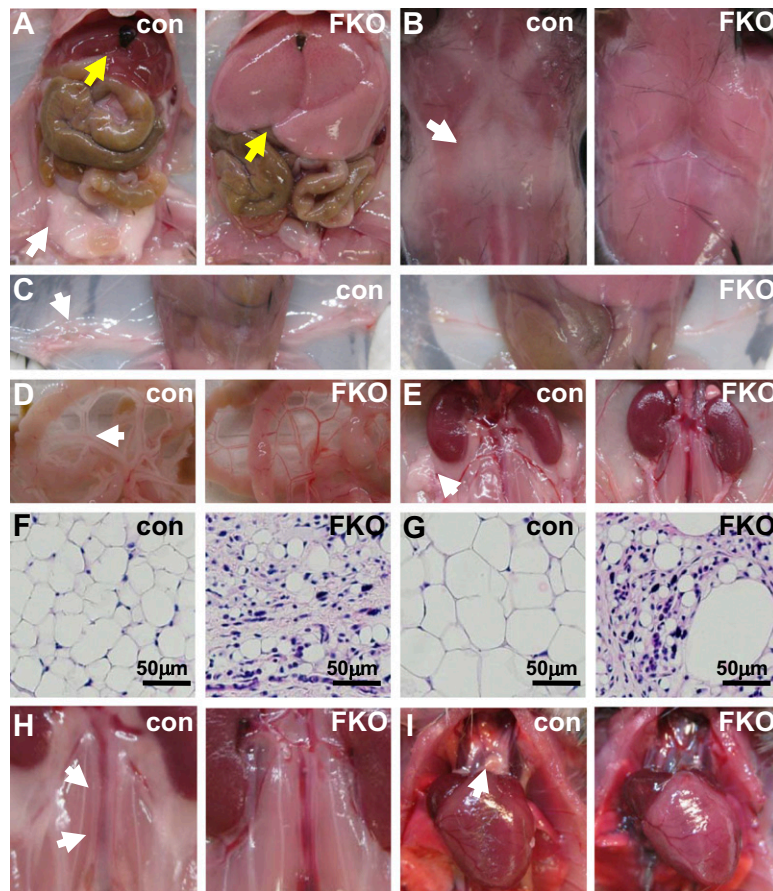

Fig. 55. Lipoatrophy in 3-mo-old female  $\text{PPAR}\gamma$  FKO mice and Loss of perivascular and pericardial WAT in 3-mo-old male  $\text{PPAR}\gamma$  FKO mice. (A–E) Gross morphology of GWAT (white arrow) and liver (yellow arrow) (A), interscapular fat (B), IWAT (C), mesenteric WAT (D), and perirenal WAT (E) from 3-mo-old female control and  $\text{PPAR}\gamma$  FKO mice. (F and G) H&E staining of IWAT (F) and GWAT (G) from 3-mo-old female control and  $\text{PPAR}\gamma$  FKO mice. (H and I) Photos of perivascular (H) and pericardial WAT (I) from 3-mo-old male control and  $\text{PPAR}\gamma$  FKO mice.

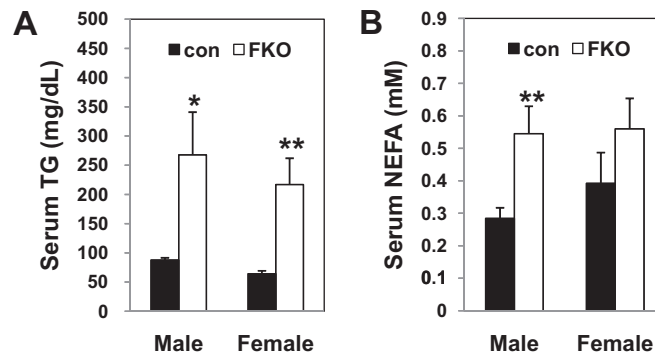

Fig. 56. Serum triglyceride (A) and free fatty acid (B) levels in male or female 3-mo-old control and  $\text{PPAR}\gamma$  FKO mice in nonfasted state. Values are mean  $\pm$  SEM ( $n = 4-6$ ). \* $P < 0.05$ ; \*\* $P < 0.01$  vs. controls.

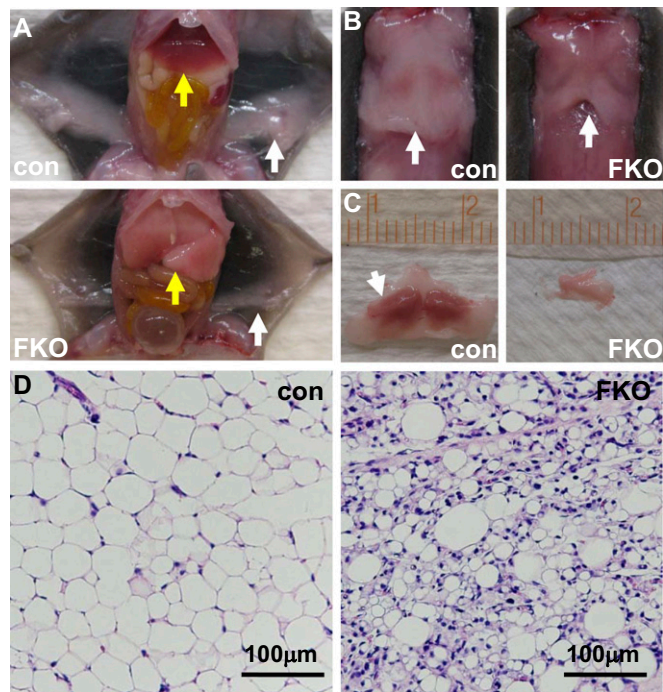

**Fig. S7.** WAT loss and pale liver is in 8-d-old female PPAR $\gamma$  FKO pups. (A) Exposed ventral view of liver (yellow arrows) and IWAT (white arrows) in the 8-d-old female control and PPAR $\gamma$  FKO pups. (B) Exposed dorsal view of interscapular WAT (arrows) in 8-d-old female control and PPAR $\gamma$  FKO mice. (C) Flip side of isolated interscapular fat depot in B from 8-d-old female control and PPAR $\gamma$  FKO pups, demonstrating the absence of BAT (arrow) in PPAR $\gamma$  FKO pups. (D) H&E staining of IWAT from 8-d-old female control and PPAR $\gamma$  FKO pups.

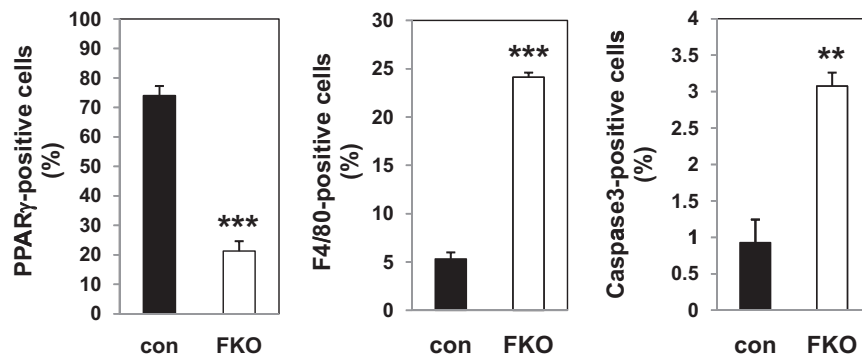

**Fig. S8.** Quantification of immunostaining results of IWATs from 8-d-old pups. Percentages of cells positive for the indicated immunohistochemical markers are shown. Values are mean  $\pm$  SEM ( $n = 3-5$ ). \*\* $P < 0.01$ ; \*\*\* $P < 0.001$  vs. controls.

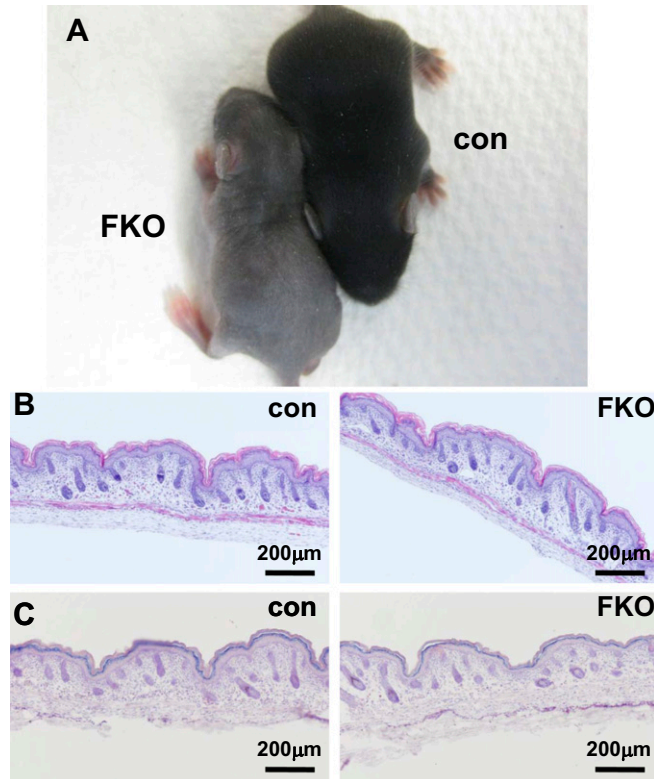

**Fig. 59.** Delayed hair coat formation in 8-d-old PPAR $\gamma$  FKO pups but no obvious alteration in skins from 1-d-old PPAR $\gamma$  FKO pups. (A) Gross coat appearance of 8-d-old control and PPAR $\gamma$  FKO pups. (B and C) H&E (B) and Oil Red O (C) staining sections of skins from 1-d-old male control and PPAR $\gamma$  FKO pups.

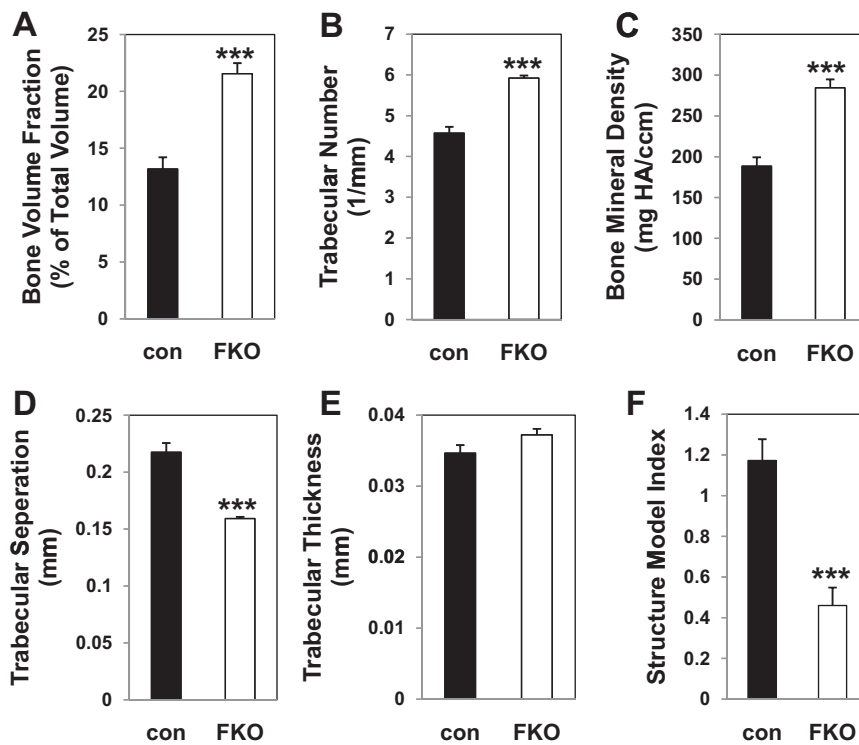

**Fig. 510.** Increased bone mass in 4-mo-old PPAR $\gamma$  FKO mice. Microcomputed tomography trabecular bone analysis of fourth lumbar vertebrae from 4-mo-old female control and PPAR $\gamma$  FKO mice was performed to generate various morphology parameters, including bone volume fraction (A), trabecular number (B), bone mineral density (C), trabecular separation (D), trabecular thickness (E), and structure model index (F). Values are mean  $\pm$  SEM ( $n = 5$ ). \*\*\* $P < 0.001$  vs. controls.

**Table S1. Primers used for reverse transcription-quantitative PCR**

| Primer name           | Sequence                   |
|-----------------------|----------------------------|
| 36B4 forward          | 5'-CGTCCTCGTTGGAGTGACAT-3' |
| 36B4 reverse          | 5'-TAGTTGGACTTCCAGGTCGC-3' |
| PPAR $\gamma$ forward | 5'-TCCAGCATTCTGTCCACA-3'   |
| PPAR $\gamma$ reverse | 5'-ACAGACTCGGCACTCAATGG-3' |
